# Supplementary material for: Dissecting the effects of water guest adsorption and framework breathing on the AlO4(OH)2 centres of metal–organic framework MIL-53 (Al) by solid state NMR and structural analysis
Source: Royal Society of Chemistry journal article supplement (doi:10.1039/d1cp03060d), 2021-01-01
Supplement: d1cp03060d1.pdf [file d1cp03060d1.pdf]

## Supplementary Information

### Dissecting the Effects of Water Guest Adsorption and Framework Breathing on the $\text{AlO}_4(\text{OH})_2$ Centers of Metal-Organic Framework MIL-53 (Al) by Solid State NMR and Structural Analysis

Alexander E. Khudozhitkov,<sup>a</sup> Sergei S. Arzumanov,<sup>a</sup> Alexander V. Toktarev,<sup>a</sup> Svetlana V. Cherepanova,<sup>a</sup> Anton A. Gabrienko,<sup>a</sup> Daniil I. Kolokolov,<sup>\*a</sup> and Alexander G. Stepanov<sup>\*a</sup>

<sup>a</sup> Borekov Institute of Catalysis, Siberian Branch of Russian Academy of Sciences  
Prospekt Akademika Lavrentieva 5, Novosibirsk 630090, Russia  
E-mail: kdj@catalysis.ru (D.I.K.), stepanov@catalysis.ru (A.G.S.)

#### 1. Structural Analysis

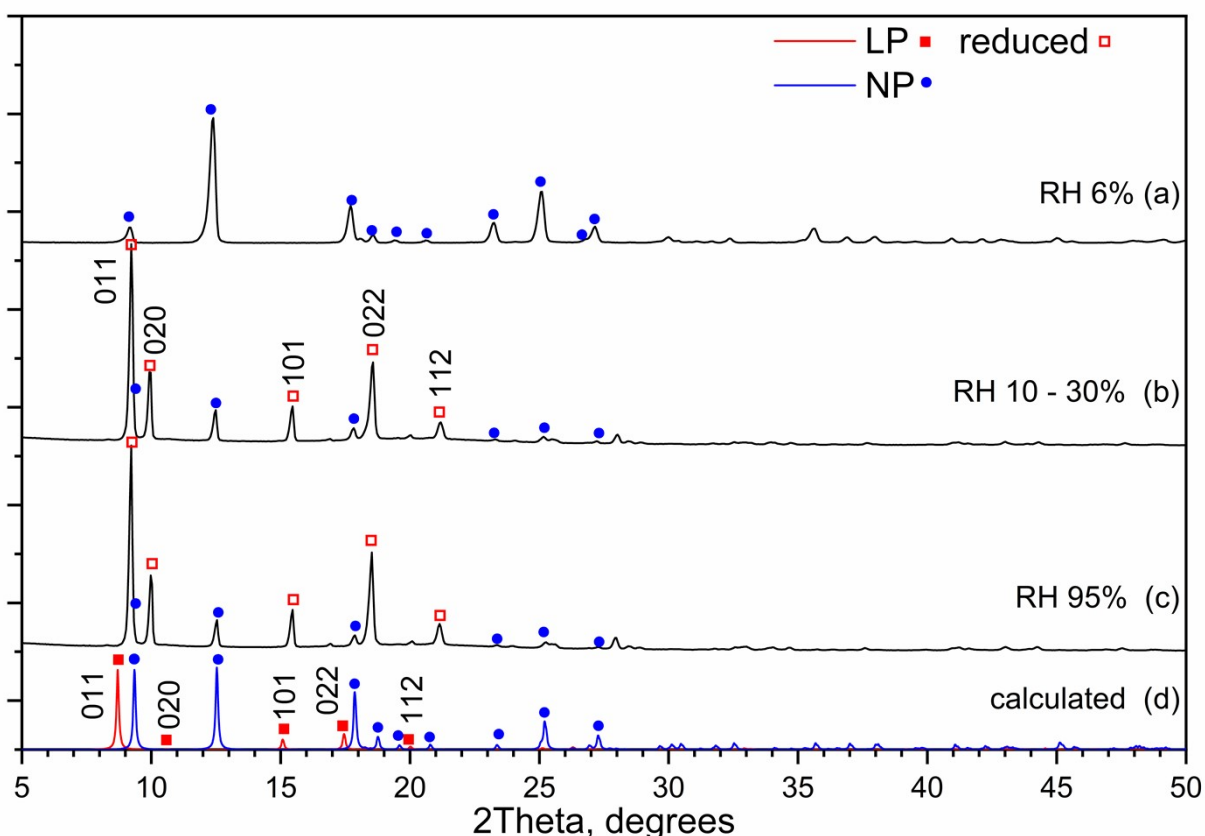

**Figure S1.** XRD patterns of the MIL-53 (Al) loaded with water at different relative humidity conditions: (a) 6% RH, (b) 10-30% RH, (c) 95%. The calculated patterns for pure NP and LP MIL-53 phases are given by solid lines. The empty symbols attribute peaks for the partially reduced LP phase, also denoted as the *iX* phase.

For the 5% RH sample on the NP phase peaks are observed. For samples with 10%, 30% and 95% RH there peaks characteristic for the reduced LP (*iX*) and the NP phases. The reduced phase LP (*iX*) differs from the ideal LP phase by a shift of the 011 and 101 peaks toward large angles, hence reflecting the decrease of the interplanar distances  $d_{011}$  and  $d_{101}$ . In contrast, the peak 020 is shifting towards small angles, reflecting the increase of the interplanar distance  $d_{020} = \mathbf{b}/2$ . The decrease of the  $d_{011}$  with simultaneous increase of the lattice parameter  $\mathbf{b}$  indicates the decrease of the lattice parameter  $\mathbf{c}$ . The parameter  $\mathbf{a}$  remains

constant, thus the decrease of the  $d_{101}$  also indicates the decrease of the parameter  $c$ . If  $b$  is increasing and  $c$  is decreasing, while  $a$  is constant, then the total unit cell volume is decreasing, i.e. the channel is contracting.

**Table 1. Lattice constants and volumes of orthorhombic unit cell, weight ratio and average crystallite sizes.**

| Sample           | LP and reduced phase |                 |                 |                   | LP:NP    | LP phase                       | NP phase                       |
|------------------|----------------------|-----------------|-----------------|-------------------|----------|--------------------------------|--------------------------------|
|                  | $a, \text{\AA}$      | $b, \text{\AA}$ | $c, \text{\AA}$ | $V, \text{\AA}^3$ | Weight % | $\langle D \rangle, \text{nm}$ | $\langle D \rangle, \text{nm}$ |
| Guest-free phase | 6.6085               | 16.675          | 12.813          | 1411.9            |          |                                |                                |
| 10 or 30% RH     | 6.609                | 17.66(2)        | 11.32(1)        | 1321(1)           | 72:28    | 55                             | 60                             |
| 95% RH           | 6.609                | 17.64(2)        | 11.36(1)        | 1324(1)           | 77:23    | 60                             | 50                             |

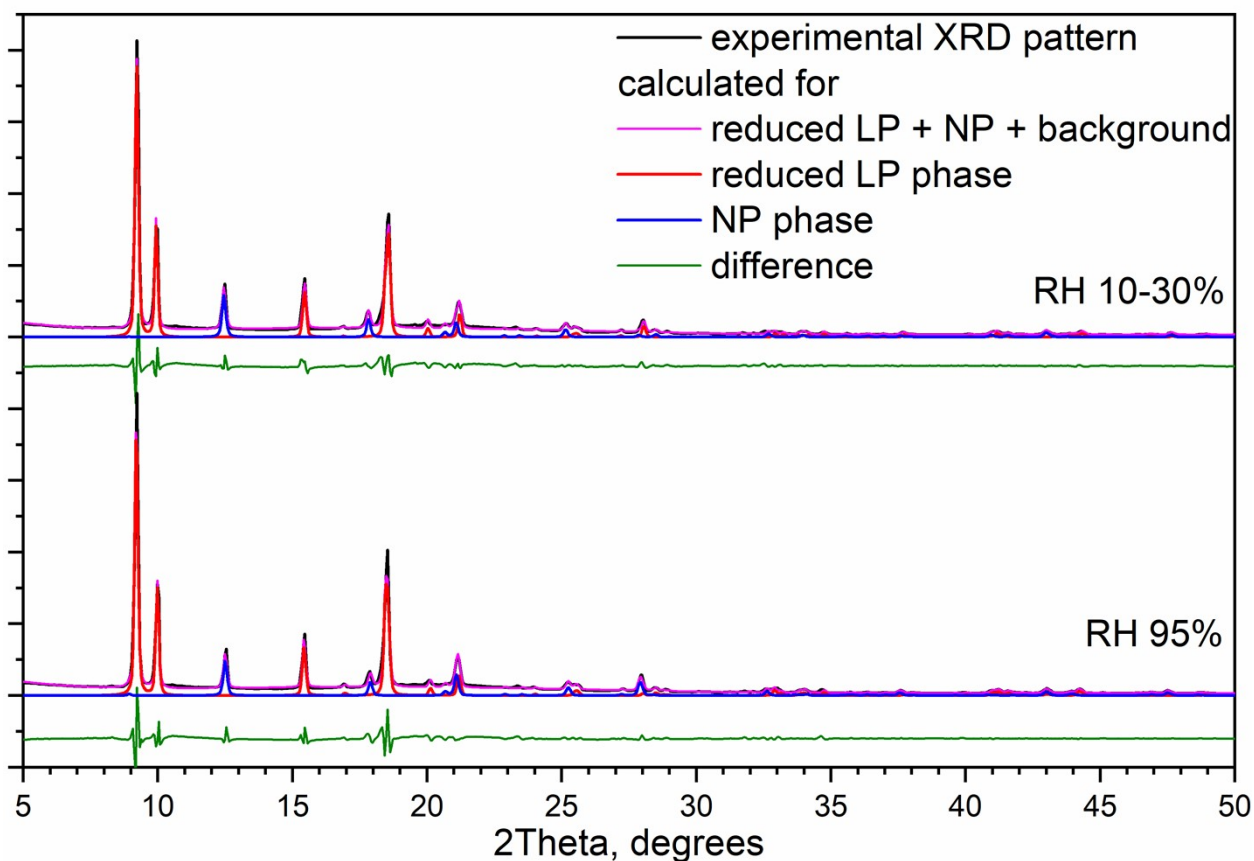

**Figure S2.** Rietveld analysis of the water-filled MIL-53 structures at different RH levels.

## 2. Experimental section

### 2.1 Materials

MIL-53 (Al) was synthesized via hydrothermal synthesis as reported previously.<sup>[2]</sup> The synthesized material showed BET surface area ( $S_{\text{BET}} = 1250 \text{ m}^2 \text{ g}^{-1}$ ). XRD pattern,  $^{27}\text{Al}$  MAS NMR spectra and SEM image of the material used in this work are shown, Figures S3-S5.

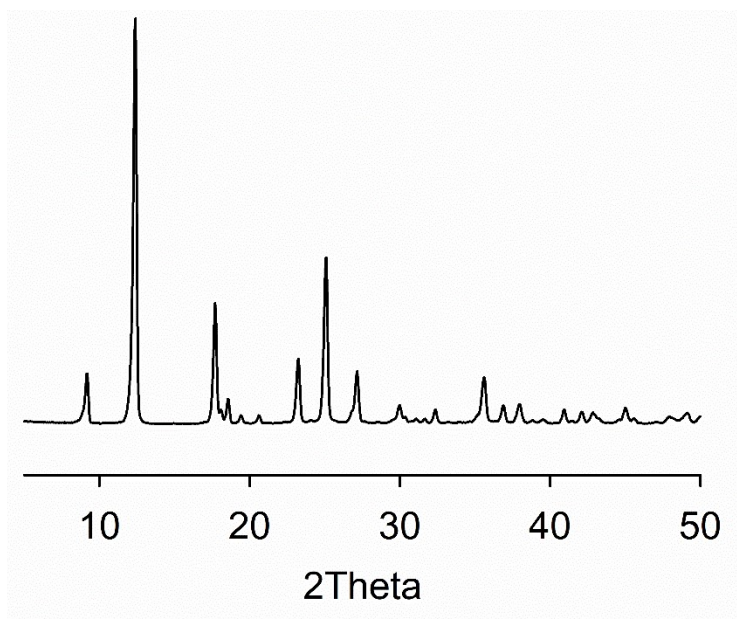

**Figure S3.** The structure of the as synthesized MIL-53 (Al) material was characterized by X-ray diffraction using Bruker D8 diffractometer with Cu K $\alpha$  radiation. The resulting XRD pattern shows a typical MIL-53 narrow pore phase due to the adsorption of atmospheric water.

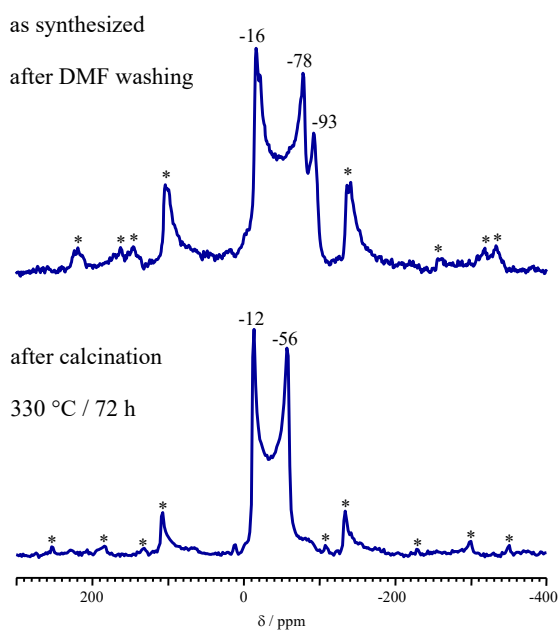

**Figure S4.**  $^{27}\text{Al}$  MAS NMR characterization of as-synthesized MIL-53 (Al). The resulting pattern correlates well with previously reported results<sup>[2-3]</sup> and shows that a pure MIL-53 phase was obtained. The  $^{27}\text{Al}$  spectra were acquired using ( $\pi/12$ ) excitation pulse, 1000 scans, 0.5 s delay, and 15 kHz spinning rate on a Bruker Avance 400 spectrometer using 4 mm rotor.

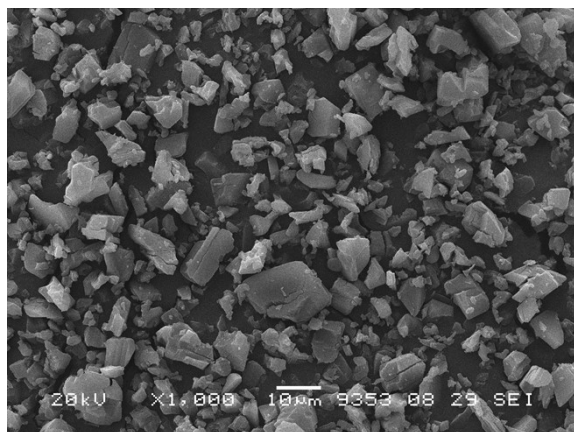

**Figure S5.** SEM image of the calcined MIL-53(Al) particles. The images were taken on a JEOL JSM-6700F instrument (acceleration voltage = 20 kV, current = 10  $\mu$ A).
